# Supplementary material for: MicroRNA-17-92 Regulates the Transcription Factor E2F3b during Myogenesis In Vitro and In Vivo
Source: MDPI journal article supplement (doi:10.3390/ijms18040727), 2017-03-31
Supplement: s1 [file s1]

**Supplementary Table S1.miRNAs predicted to target the 3'UTR of E2F3**

|                                      |
|--------------------------------------|
| miR-34ac/449abc                      |
| miR-15abc/16abc/195/322/424/497/1907 |
| miR-10abc                            |
| miR-141/200a                         |
| miR-490                              |
| miR-199ab                            |
| miR-25/32/92abc/363/367              |
| miR-200bc/429/548a                   |
| miR-125ab/351/670/4319               |
| miR-221/222ab/1928                   |
| miR-124ab/506                        |
| miR-503                              |
| miR-193ab                            |
| miR-33ab                             |
| miR-148ab/152                        |
| miR-30abcdef/384                     |
| miR-375                              |
| miR-194                              |
| miR-128ab                            |
| miR-21/590                           |
| miR-17/20ab/93/106ab/427/518a/519d   |
| miR-145                              |
| miR-142                              |
| miR-27abc                            |
| miR-31                               |
| miR-153                              |
| miR-203                              |
| let-7/miR-98/4458/4500               |

**Supplementary Table S2. Primers used for quantitative PCR.**

|                 |                                                          |
|-----------------|----------------------------------------------------------|
| mmu-miR-17-FW   | 5'-TGGCAAAGTGCTTACAGTGC-3'                               |
| mmu-miR-17-REV  | 5'-GTGCAGGGTCCGAGGTCAGAGCCACCTGGGCAATTTTTTTTTTTCTACCT-3' |
| mmu-miR-20a-FW  | 5'-TCGGTAAAGTGCTTATAGTGC-3'                              |
| mmu-miR-20a-REV | 5'-GTGCAGGGTCCGAGGTCAGAGCCACCTGGGCAATTTTTTTTTTTCTACCT-3' |
| SNORNA234-FW    | 5'-GATTTAACAAAAATTCGTCACTACCA-3'                         |
| SNORNA234-REV   | 5'-GTGCAGGGTCCGAGGTCAGAGCCACCTGGGCAATTTTTTTTTTTCTCAG-3'  |
| E2F3b- FW       | 5'-CCCTTACAGCAGCAGGCAAAGCGAA-3'                          |
| E2F3b- REV      | 5'-GGCTCAGGAGCTGAATGAACTTCTT-3'                          |
| RPL14-FW        | 5'-GGCTTTAGTGGATGGACCCT-3'                               |
| RPL14-REV       | 5'-ATTGATATCCGCCTTCTCCC-3'                               |

**Supplementary Table S3. Primers used for plasmids construction.**

|                 |                                                                     |
|-----------------|---------------------------------------------------------------------|
| E2F3-1-shRNA-P1 | 5'-ACCGCCAAGACCACAATGGGAATATCTCGAGATA-3'                            |
| E2F3-1-shRNA-P2 | 5'-AAAACCAAGACCACAATGGGAATATCTCGAGATA-3'                            |
| E2F3-1-shRNA-P3 | 5'-TTCCCATTTGTGGTCTTGG-3'                                           |
| E2F3-2-shRNA-P1 | 5'-ACCGGGAAGGCATCCACCTCATTAACCTCGAGTTA-3'                           |
| E2F3-2-shRNA-P2 | 5'-AAAAGGAAGGCATCCACCTCATTAACCTCGAGTTA-3'                           |
| E2F3-2-shRNA-P3 | 5'-ATGAGGTGGATGCCTTCC-3'                                            |
| E2F3b-P1        | 5'-CCACTCGAGATGCCCTTACAGCAGCAGGCAAAGCGAAGGCTGGAGCTAGGAGAAAGCGG-3'   |
| E2F3b-P2        | 5'-GCTAGGAGAAAGCGGTCATCAGTACCTCTCAGATGGTTTAAAAACCCCAAGGGCAAAG-3'    |
| E2F3b-P3        | 5'-CCCAAGGGCAAAGGAAGAGCTGCACTACGAAGTCCAGATAGTCCAAAAAAAAAAAAACGCG-3' |
| E2F3b-P4        | 5'-CGAGGCTCAGGAGATAGTCCTCTTGCAGCAGGGGAGGCAGTAAGTTC-3'               |
| E2F3b-P5        | 5'-CCAAATCGTAAGCATCGAAGAGATCGCTGATGCCTTCCTCCTCCCCGAGGCTCAGGAGA-3'   |
| E2F3b-P6        | 5'-GTTGAATTCTCAACTACACATGAAGTCTTCCACCAGTGGGAGCTTTTCCAAATCGTAAG-3'   |
| E2F3-3-UTR- FW  | 5'-ACTGGAATTCGATCTAAGGTTTATCAGCCTCTGCA-3'                           |
| E2F3-3-UTR- REV | 5'-GAACCTCGAGTGACCAAGTCCAGTGTGTGTGAG-3'                             |
